# Supplementary material
Source: PubMed Central journal article supplement (PMC3928004)
Supplement: supp_cvt341_cvt341supp.pdf [file supp_cvt341_cvt341supp.pdf]

**Supplemental Table**

|                                  | NC          | HFD         |                    |
|----------------------------------|-------------|-------------|--------------------|
|                                  |             | --          | OA-NO <sub>2</sub> |
| <b>Cardiac Output (ml / min)</b> | 20.5 ± 0.4  | 14.7 ± 1.2  | 17.7 ± 2.7         |
| <b>LV CI</b>                     | 142.6 ± 3.7 | 125.2 ± 9.7 | 127.2 ± 17.1       |
| <b>LV Tau (ms)</b>               | 4.2 ± 0.11  | 5.4 ± 0.60  | 5.7 ± 1.2          |
| <b>LV EDP (mmHg)</b>             | 4.2 ± 0.25  | 5.3 ± 2.40  | 3.3 ± 0.90         |
| <b>LV ESP (mmHg)</b>             | 73.3 ± 1.2  | 76.1 ± 8.4  | 57.5 ± 7.5         |

**Table S1. Hemodynamic function of left ventricle in NC, HFD and HFD treated with OA-NO<sub>2</sub>.**  
Data represents mean ± SEM; no statistical significance between all groups (n≥6 per group)
